# Supplementary material for: Fluorescent chemodosimeter based on spirobenzopyran for organophosphorus nerve agent mimics (DCP)
Source: Royal Society of Chemistry journal article supplement (doi:10.1039/c5ra01216c), 2015-01-01
Supplement: c5ra01216c1.pdf [file c5ra01216c1.pdf]

## Supporting Information

# Fluorescent chemodosimeter based on spirobenzopyran in NIR for organophosphorus nerve agent mimics (DCP)

Shyamaprosad Goswami,\* Sangita Das, Krishnendu Aich

<sup>a</sup>Department of Chemistry, Bengal Engineering and Science University, Shibpur, Howrah 711103, West Bengal, India E-mail: [spgoswamical@yahoo.com](mailto:spgoswamical@yahoo.com)

### 1. Synthetic scheme for the preparation of the probe (SBN):

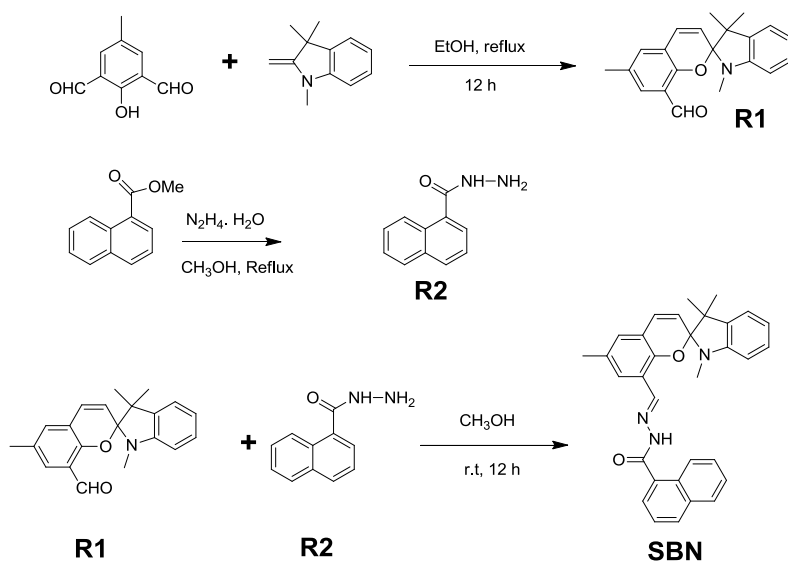

**Scheme 1:** Synthetic strategy of SBN

### 2. Time dependent fluorescence change of SBN upon addition of DCP and reaction kinetics:

The time vs. emission  $I_{675}$  plots was obtained by using first order rate equation. We get the rate constant =  $k = \text{slope} \times 2.303 = 0.55 \times 10^{-2} \text{ Sec}^{-1}$ .

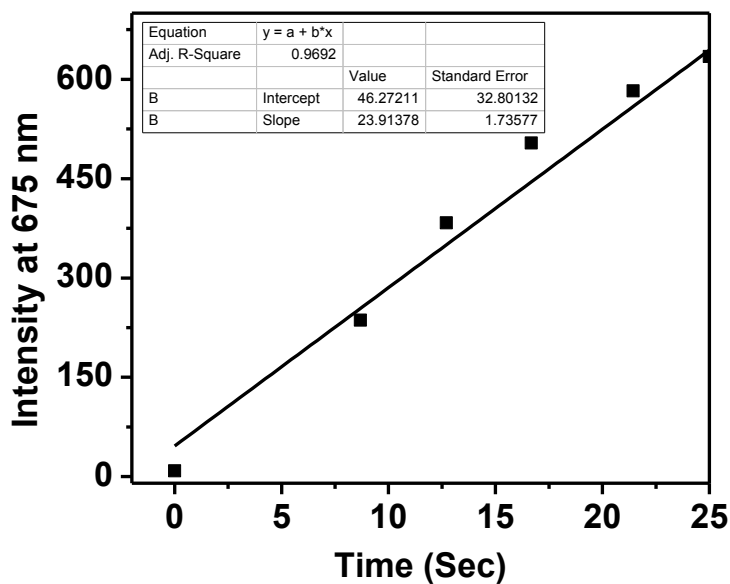

**Figure S1:** Time (Sec) vs. emission ( $I_{675}$ ) plot

3. Comparison of absorbance and fluorescence study of SBN after addition of DCP and other analytes.

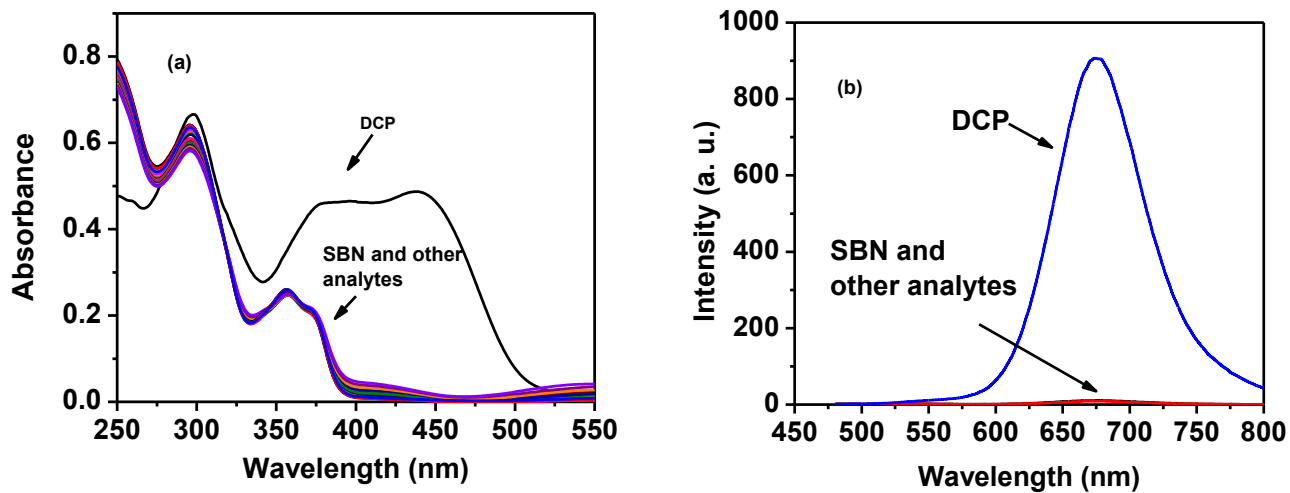

**Figure S2.** (a) Absorbance and (b) fluorescence spectra of SBN (10  $\mu$ M) upon addition of different analytes (5 equivalents) in aqueous- $\text{CH}_3\text{CN}$  solution.

#### 4. Determination of detection limit

The detection limit was calculated based on the fluorescence titration. To determine the S/N ratio, the emission intensity of **SBN** without DCP was measured by 10 times and the standard deviation of blank measurements was determined.

The detection limit (DL) of **SBN** for DCP was determined from the following equation:  $DL = K \times Sb_1/S$ , Where  $K = 2$  or  $3$  (we take  $3$  in this case);  $Sb_1$  is the standard deviation of the blank solution;  $S$  is the slope of the calibration curve.

From the graph we get slope =  $7.58 \times 10^7$ , and  $Sb_1$  value is  $0.54$

Thus using the formula we get the Detection Limit =  $2.1 \times 10^{-8}$  M i.e. **SBN** can detect DCP in this minimum concentration by fluorescence techniques

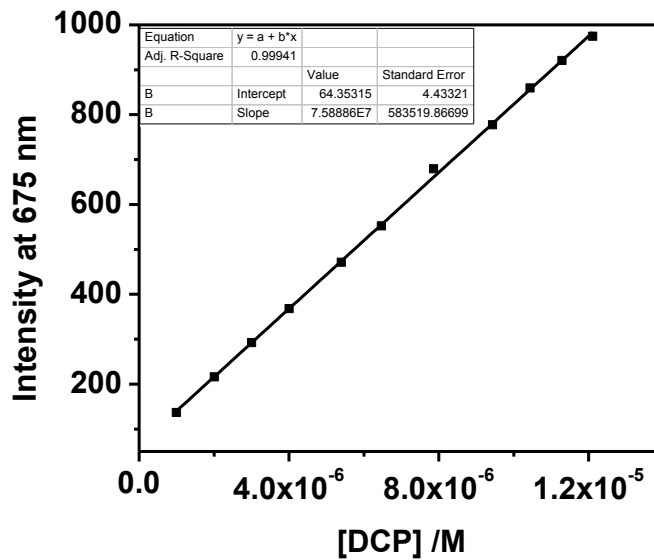

**Figure S3:** The linear response curve of emission at 675 nm of **SBN** depending on DCP concentration

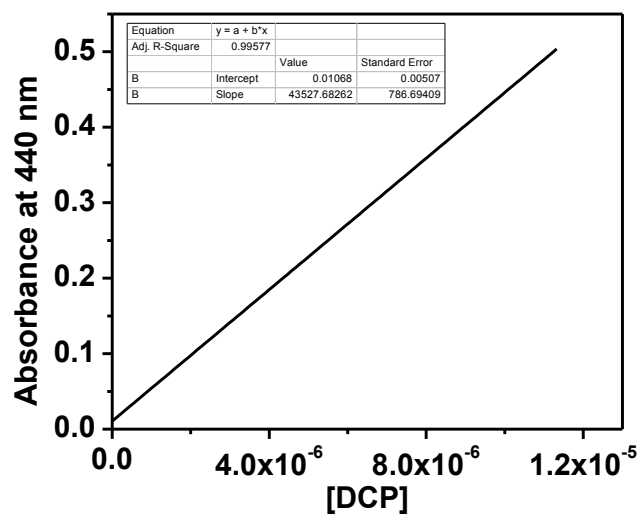

**Figure S4:** The linear response curve of absorbance at 440 nm of SBN depending on DCP concentration

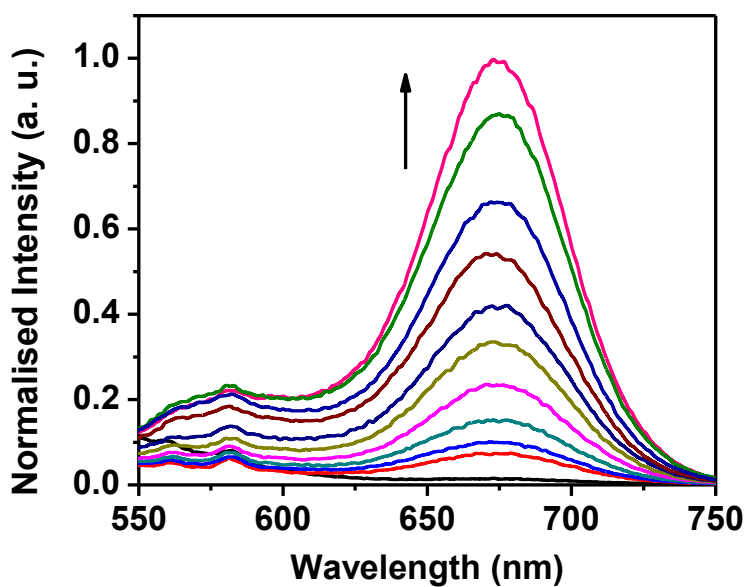

**Figure S5:** Change of emission intensity of SBN (10  $\mu\text{M}$ ) upon addition of DCP ( $1 \times 10^{-4}$  M) in DCM

## 5. NMR and HRMS of SBN

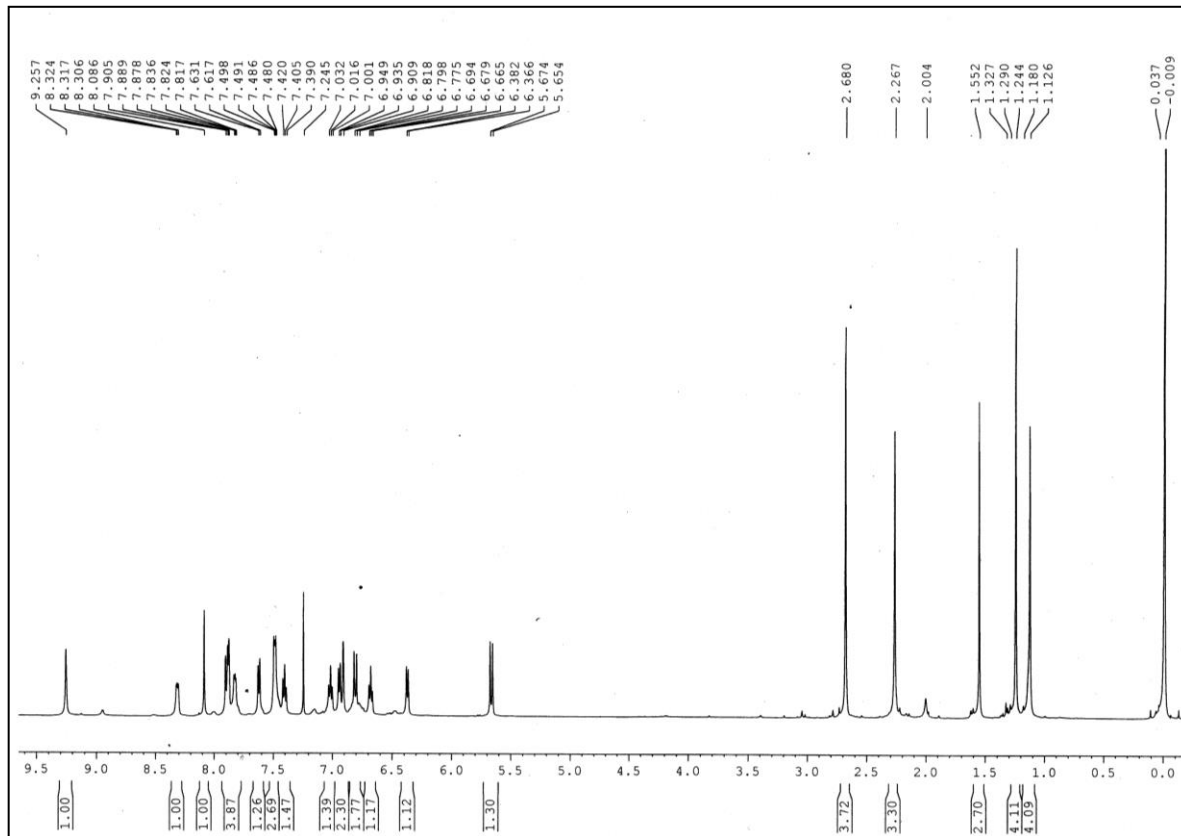

**Figure S6:**  $^1\text{H}$  NMR (400 MHz) spectra of compound SBN in  $\text{CDCl}_3$

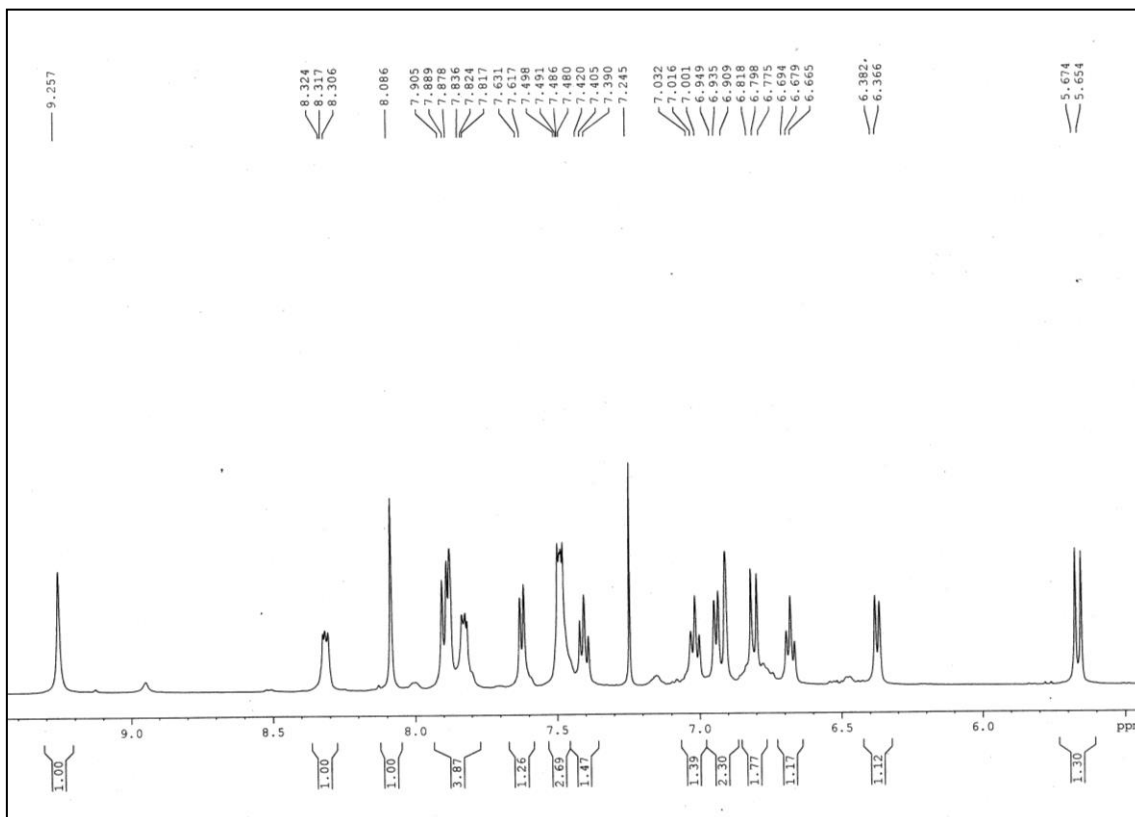

Figure S7:  $^1\text{H}$  NMR (expansion) spectra of compound SBN in  $\text{CDCl}_3$ .

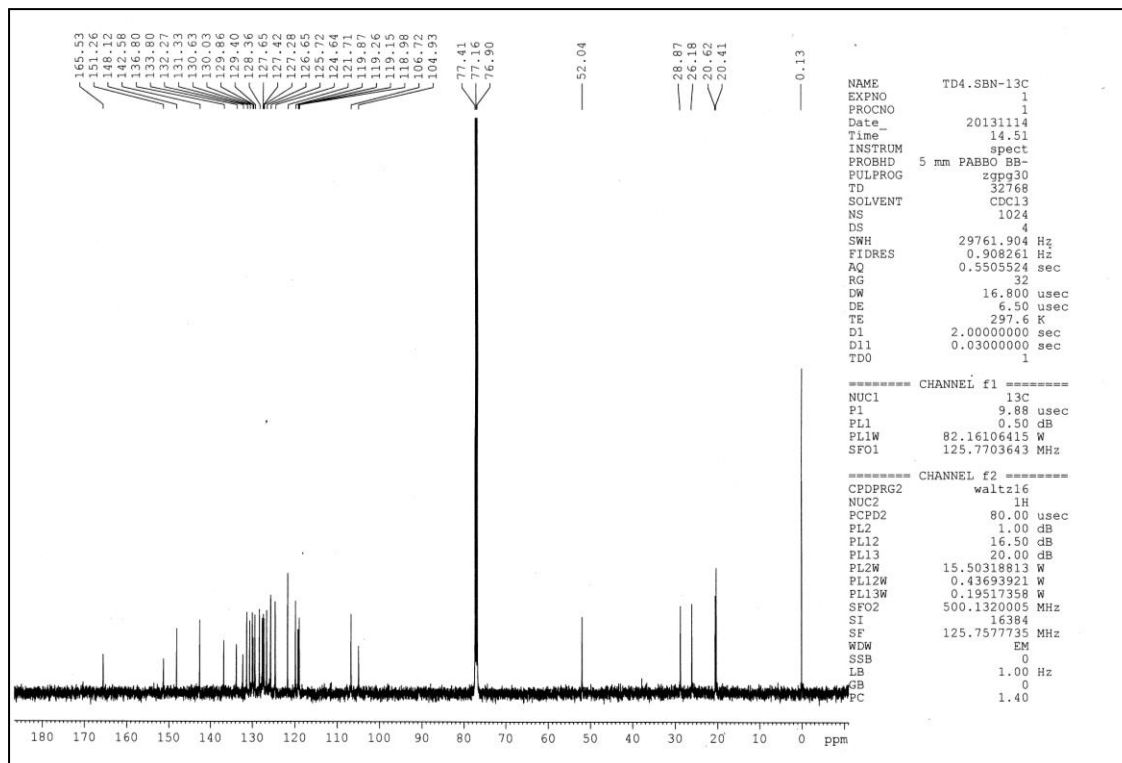

Figure S8:  $^{13}\text{C}$  NMR (125 MHz) spectra of compound SBN in  $\text{CDCl}_3$ .

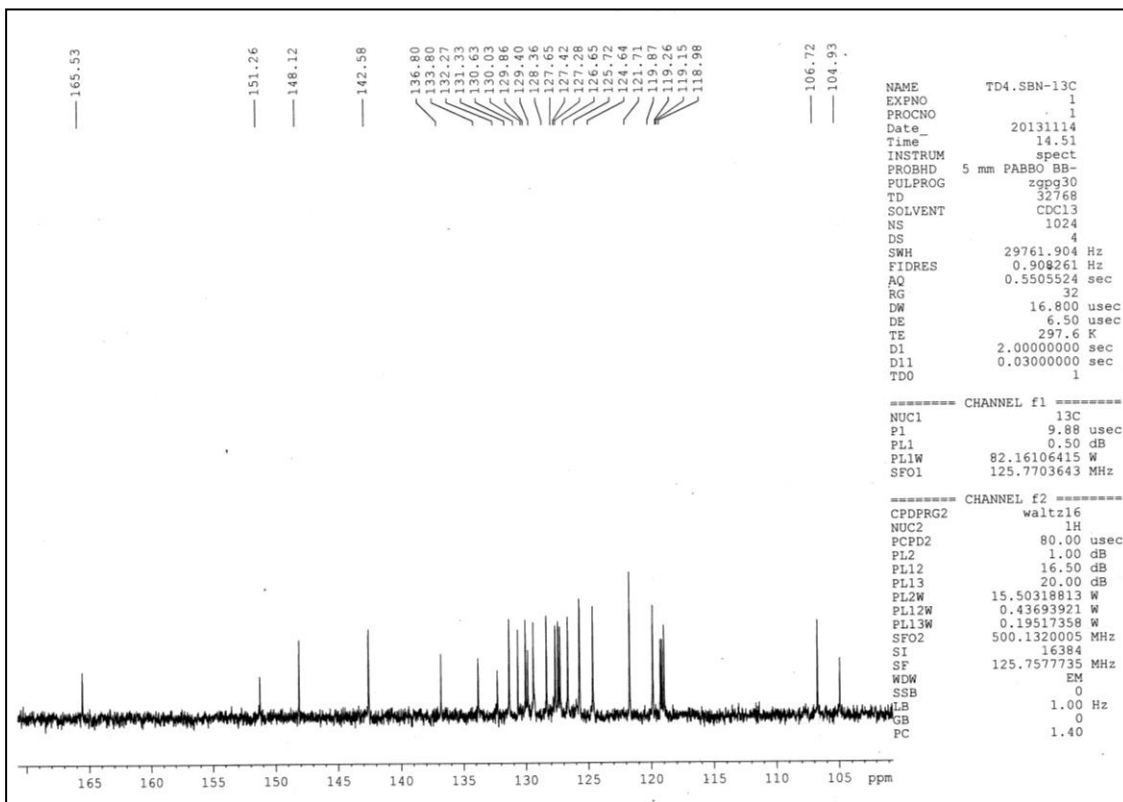

Figure S9:  $^{13}\text{C}$  NMR (expansion) spectra of compound SBN in  $\text{CDCl}_3$ .

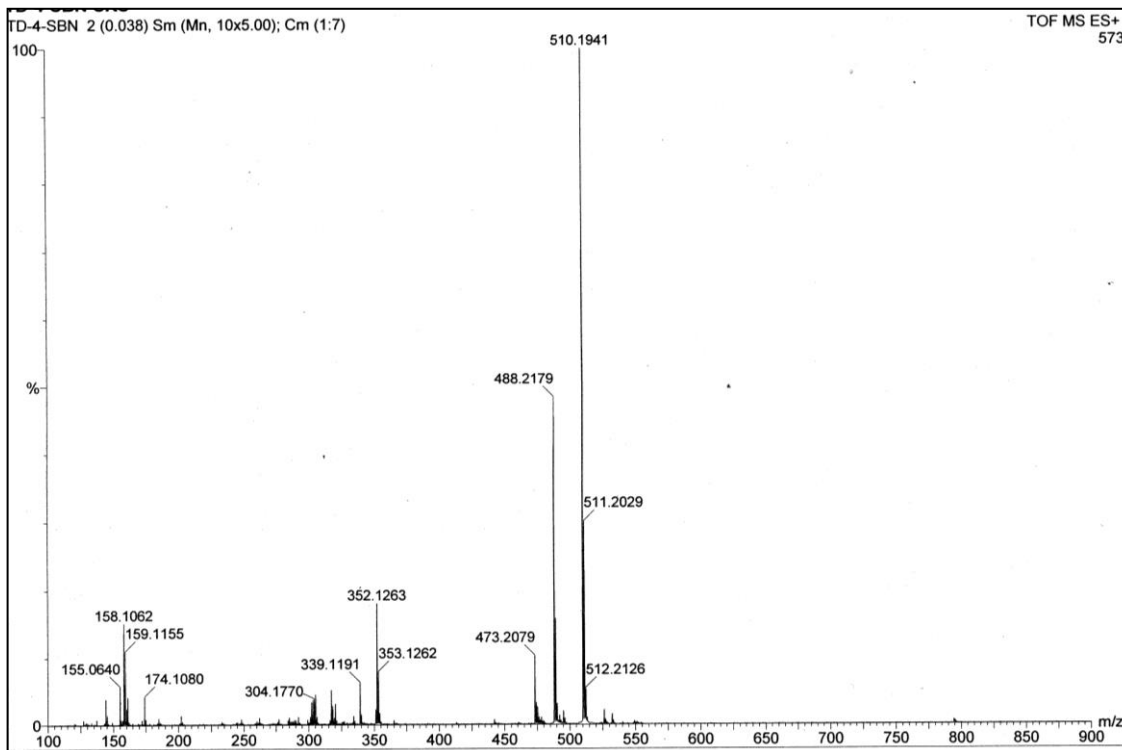

Figure S10: HRMS of the receptor (SBN).

## 6. $^1\text{H}$ and $^{13}\text{C}$ NMR of reaction product:

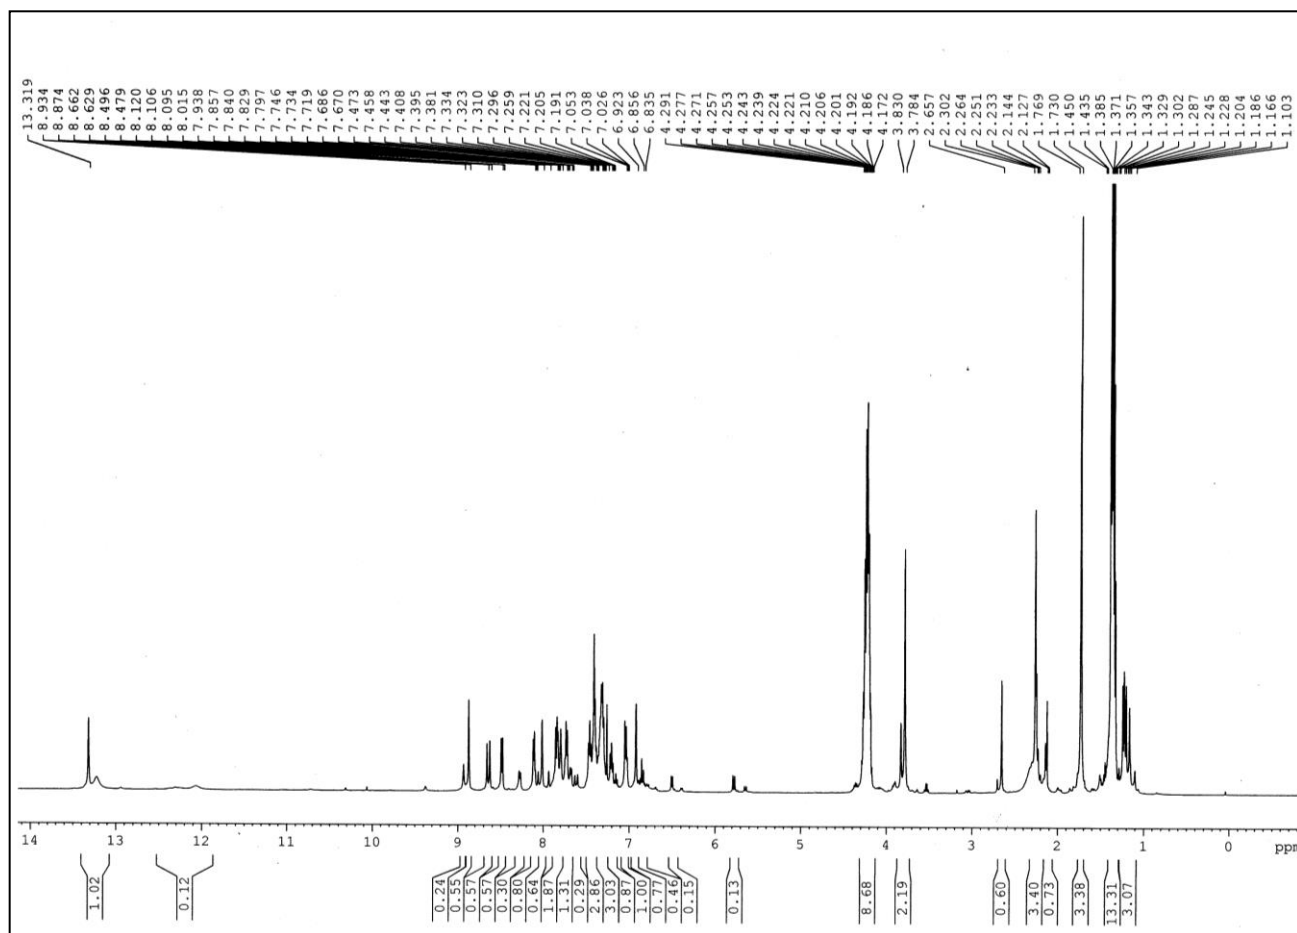

Figure S11:  $^1\text{H}$  NMR (400 MHz) of the reaction product after hydrolysis.



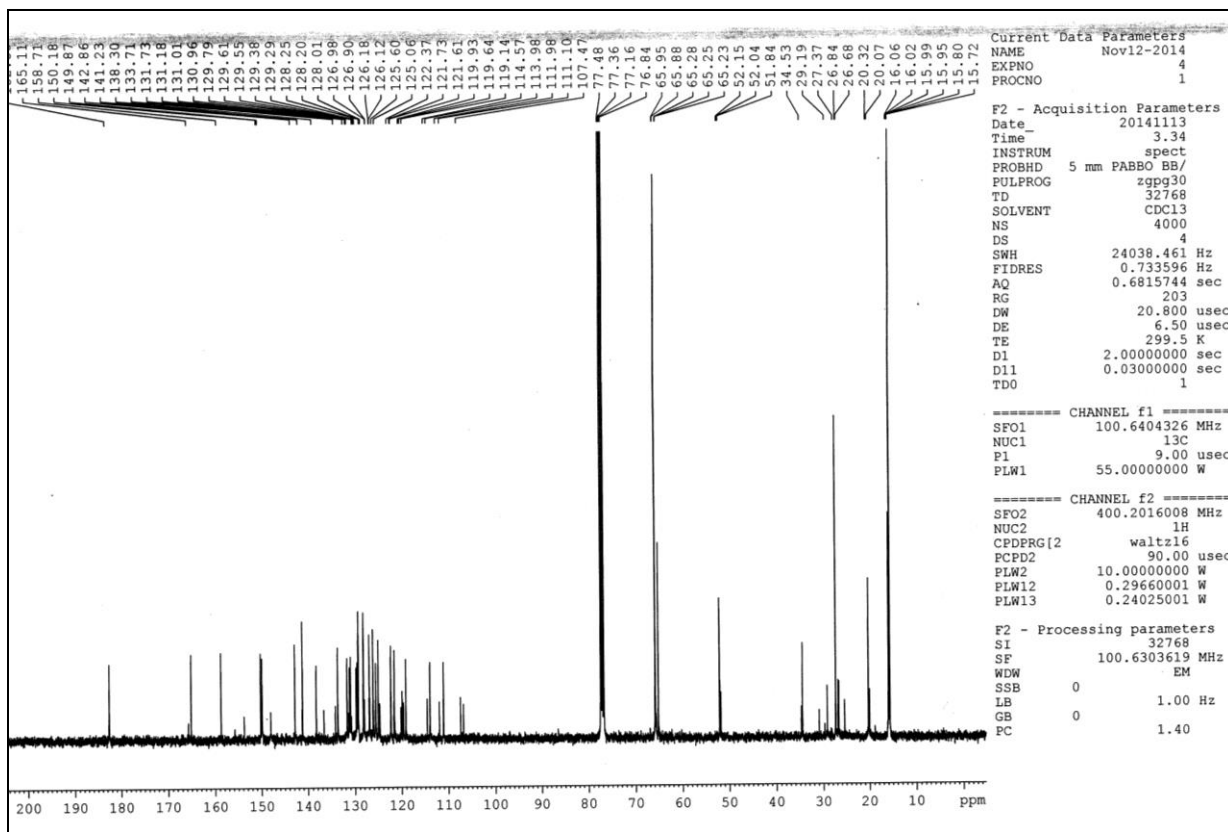

Figure S12:  $^{13}\text{C}$  NMR (100 MHz) of the reaction product after hydrolysis.

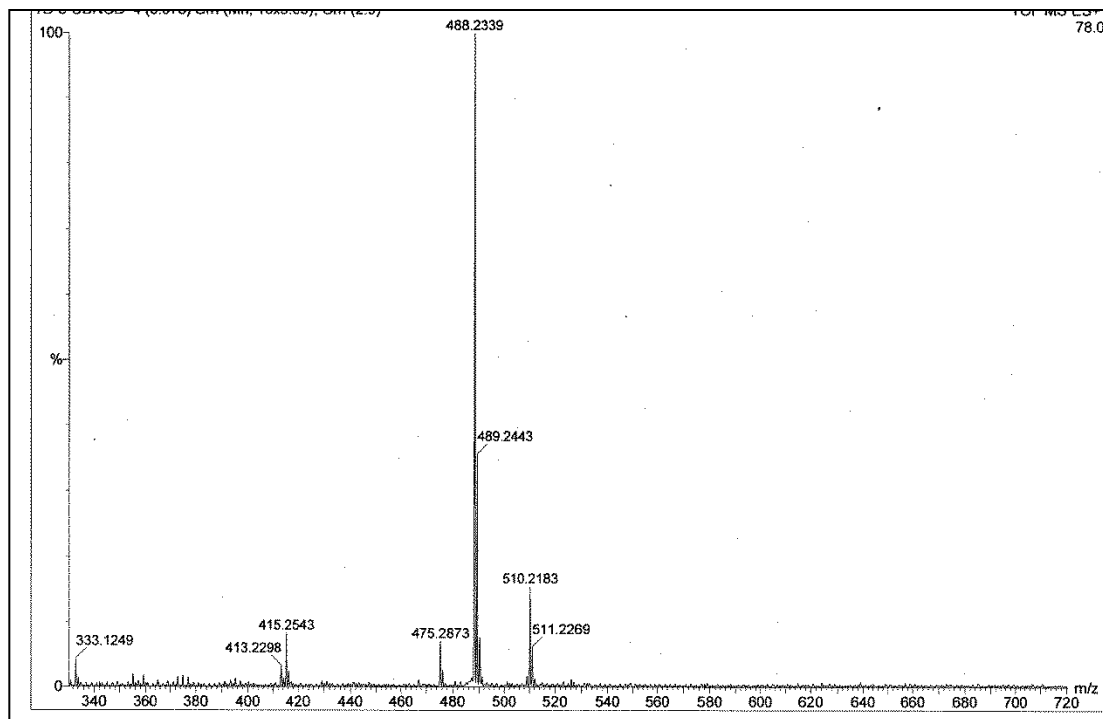

**Figure S13: HRMS of the reaction product after hydrolysis.**

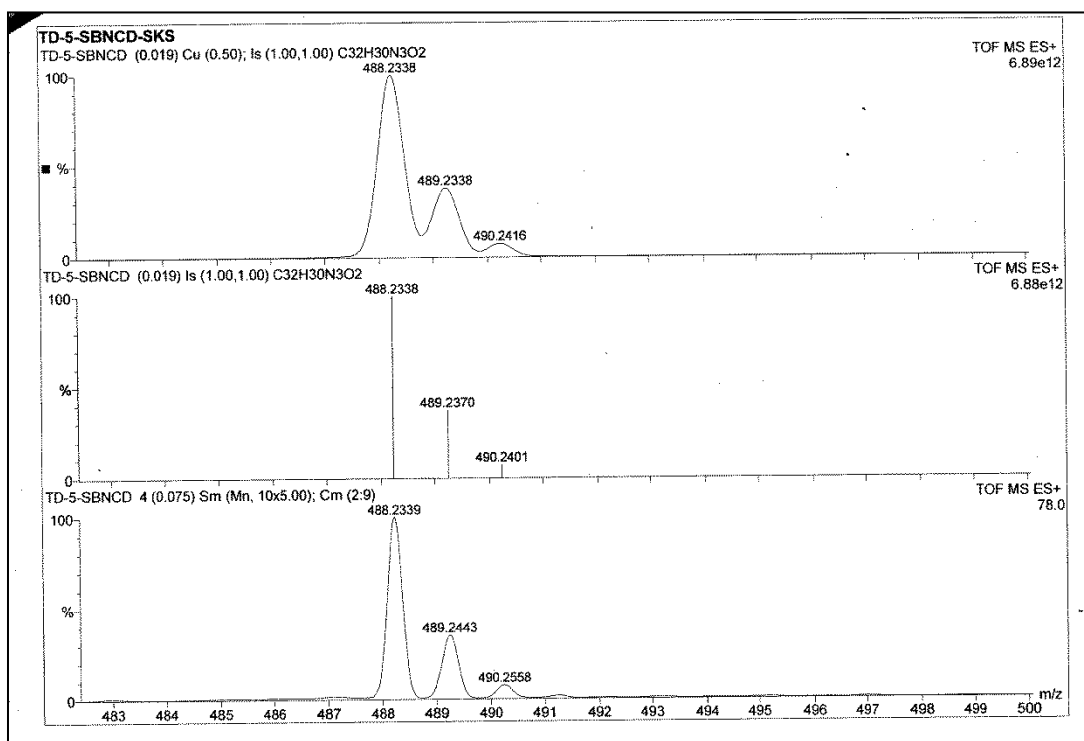

**Figure S14: HRMS (expansion) of the reaction product after hydrolysis.**
